# Supplementary material for: The Role of Lipid Competition for Endosymbiont-Mediated Protection against Parasitoid Wasps in Drosophila
Source: PubMed Central journal article supplement (PMC4958261; doi:10.1128/mbio.01006-16), 2016-07-12
Supplement: mbo004162895sf1.pdf [file mbo004162895sf1.pdf]

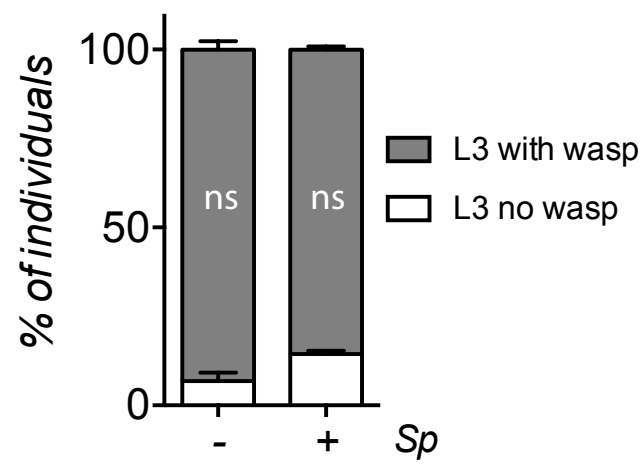

Figure S1
